# Supplementary material for: Combined Photothermal Therapy and Lycium barbarum Polysaccharide for Topical Administration to Improve the Efficacy of Doxorubicin in the Treatment of Breast Cancer
Source: MDPI journal article supplement (doi:10.3390/pharmaceutics14122677), 2022-12-01
Supplement: s1 [file s1]

## Supplementary Materials

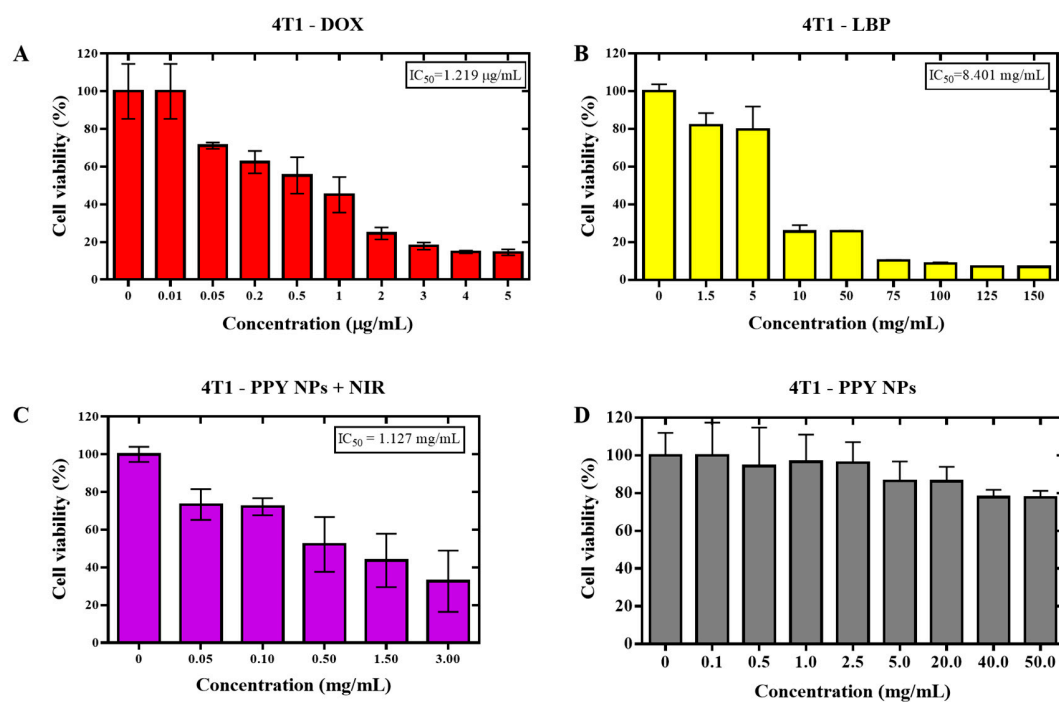

Figure S1: Cell viability of DOX, LBP, PPY NPs + NIR, PPY NPs against 4T1 cell line for incubation 72 h at 37°C, n = 5.

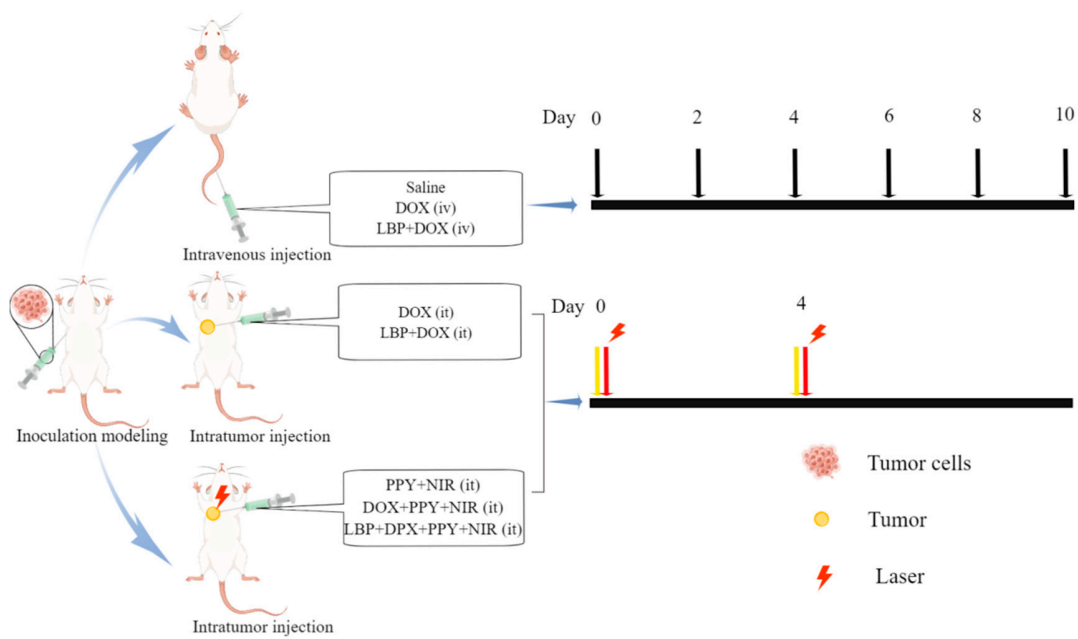

Figure S2: Treatment schedule scheme: intravenous injection and intratumoral injection  
(This picture was drawn by Figdraw.);

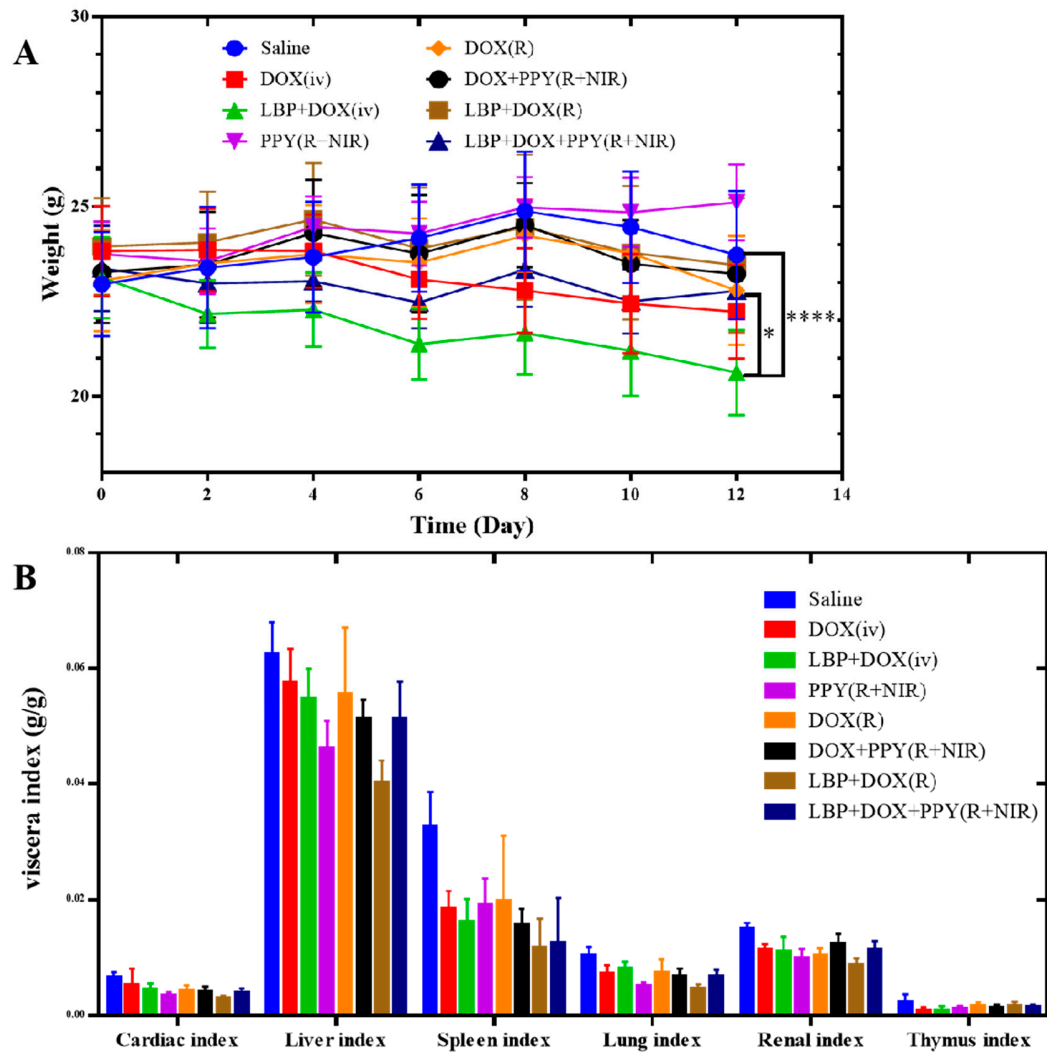

Figure S3: Changes of body weight (A) (mean  $\pm$  SD,  $n = 6$ ); Organ index of 8 groups of animals,  $n = 6$ . (B).
